# Supplementary material for: Reliability of ERA5 Reanalysis Data for Wind Resource Assessment: A Comparison against Tall Towers
Source: MDPI journal article supplement (doi:10.3390/en14144169), 2021-07-10
Supplement: s1 [file s1]

## Supplementary material

**Table S1.** Terrain and land cover characteristics of ERA5 grid points falling within a 0.25-deg buffer from each site's location<sup>1</sup>.

| Tall towers    |                 |   | ERA5 grid points |                 |                                   |                        |     |                                    |                |                         |                 |                           |
|----------------|-----------------|---|------------------|-----------------|-----------------------------------|------------------------|-----|------------------------------------|----------------|-------------------------|-----------------|---------------------------|
| Lat<br>(deg N) | Long<br>(deg E) | # | Lat<br>(deg N)   | Long<br>(deg E) | Distance<br>from<br>tower<br>(km) | Altitude<br>(m a.s.l.) |     | Surface<br>roughness<br>length (m) | Low vegetation |                         | High vegetation |                           |
|                |                 |   |                  |                 |                                   | μ                      | σ   |                                    | Cover<br>(%)   | Category                | Cover<br>(%)    | Category                  |
| FINO3          |                 |   |                  |                 |                                   |                        |     |                                    |                |                         |                 |                           |
| 55.19          | 7.16            |   |                  |                 |                                   |                        |     |                                    |                |                         |                 |                           |
|                |                 | 1 | 55.25            | 7.00            | 12.149                            | < 0                    |     | 0.0                                | 100            | Sea                     |                 |                           |
|                |                 | 2 | 55.00            | 7.00            | 23.458                            | < 0                    |     | 0.0                                | 100            | Sea                     |                 |                           |
|                |                 | 3 | 55.25            | 7.25            | 8.783                             | < 0                    |     | 0.0                                | 100            | Sea                     |                 |                           |
|                |                 | 4 | 55.00            | 7.25            | 21.895                            | < 0                    |     | 0.0                                | 100            | Sea                     |                 |                           |
| Cabauw         |                 |   |                  |                 |                                   |                        |     |                                    |                |                         |                 |                           |
| 51.97          | 4.93            |   |                  |                 |                                   |                        |     |                                    |                |                         |                 |                           |
|                |                 | 1 | 52.00            | 4.75            | 12.774                            | -1                     | 2   | 0.3                                | 90             | Crops and mixed farming | 10              | Interrupted forest        |
|                |                 | 2 | 52.00            | 5.00            | 5.842                             | -1                     | 3   | 0.3                                | 90             | Crops and mixed farming | 10              | Interrupted forest        |
|                |                 | 3 | 51.75            | 5.00            | 24.938                            | 2                      | 3   | 0.4                                | 90             | Crops and mixed farming | 10              | Interrupted forest        |
| Boulder        |                 |   |                  |                 |                                   |                        |     |                                    |                |                         |                 |                           |
| 39.91          | -105.23         |   |                  |                 |                                   |                        |     |                                    |                |                         |                 |                           |
|                |                 | 1 | 40.00            | -105.25         | 10.155                            | 2026                   | 190 | 0.5                                | 90             | Short grass             | 10              | Deciduous broadleaf trees |
|                |                 | 2 | 39.75            | -105.25         | 17.878                            | 2131                   | 161 | 0.6                                | 80             | Short grass             | 20              | Deciduous broadleaf trees |
|                |                 | 3 | 40.00            | -105.00         | 22.017                            | 1623                   | 108 | 0.1                                | 90             | Short grass             | 10              | Deciduous broadleaf trees |
| Ghoroghchi     |                 |   |                  |                 |                                   |                        |     |                                    |                |                         |                 |                           |
| 33.59          | 51.00           |   |                  |                 |                                   |                        |     |                                    |                |                         |                 |                           |
|                |                 | 1 | 33.75            | 51.00           | 17.796                            | 2019                   | 194 | 0.0                                | 70             | Semidesert              |                 |                           |
|                |                 | 2 | 33.50            | 51.00           | 10.010                            | 2065                   | 101 | 0.0                                | 70             | Semidesert              |                 |                           |
| Humansdorp     |                 |   |                  |                 |                                   |                        |     |                                    |                |                         |                 |                           |
| -34.11         | 24.51           |   |                  |                 |                                   |                        |     |                                    |                |                         |                 |                           |
|                |                 | 1 | -34.00           | 24.50           | 12.270                            | 206                    | 68  | 0.1                                | 90             | Short grass             | 10              | Deciduous broadleaf trees |
|                |                 | 2 | -34.25           | 24.50           | 15.599                            | 39                     | 23  | 0.2                                | 20             | Crops and mixed farming | 60              | Interrupted forest        |
| Wallaby Creek  |                 |   |                  |                 |                                   |                        |     |                                    |                |                         |                 |                           |
| -37.43         | 145.19          |   |                  |                 |                                   |                        |     |                                    |                |                         |                 |                           |
|                |                 | 1 | -37.50           | 145.00          | 18.493                            | 260                    | 52  | 0.5                                | 70             | Crops and mixed farming | 30              | Interrupted forest        |
|                |                 | 2 | -37.25           | 145.25          | 20.712                            | 334                    | 112 | 0.7                                | 40             | Crops and mixed farming | 60              | Interrupted forest        |
|                |                 | 3 | -37.50           | 145.25          | 9.417                             | 339                    | 125 | 1.6                                |                |                         | 100             | Evergreen broadleaf trees |

<sup>1</sup> ECMWF low/high vegetation types considered as land cover categories [49].

<sup>2</sup> Locations' maps of mean altitude and roughness length are presented in Figures S1 and Figures S2, respectively.

**Table S2.** Statistical values of annual air density observed vs. estimated by ERA5 at the six towers<sup>1</sup>.

| Height<br>(m) | N (%)         | Observations         | Estimations          |                      |                      |                      | Statistical indicators |                      |       |      |
|---------------|---------------|----------------------|----------------------|----------------------|----------------------|----------------------|------------------------|----------------------|-------|------|
|               |               | $\mu_o$              | $\sigma_o$           | $\mu_p$              | $\sigma_p$           | MB                   | NB                     | RMSE                 | NRMSE | r    |
|               |               | (kg/m <sup>3</sup> ) |                        | (kg/m <sup>3</sup> ) |       |      |
| FINO3         |               |                      |                      |                      |                      |                      |                        |                      |       |      |
| 60            | 15815 (90.27) | 1.235                | 0.026                | 1.235                | 0.022                | 0.000                | 0.00                   | 0.014                | 0.01  | 0.85 |
| 100           | 15439 (88.12) | 1.231                | 0.023                | 1.230                | 0.022                | 0.001                | 0.00                   | 0.004                | 0.00  | 0.98 |
| Cabauw        |               |                      |                      |                      |                      |                      |                        |                      |       |      |
| 40            | 17512 (99.95) | 1.232                | 0.097                | 1.239                | 0.028                | -0.007               | -0.01                  | 0.095                | 0.08  | 0.21 |
| 80            | 17511 (99.95) | 1.174                | 0.313                | 1.234                | 0.028                | -0.060               | -0.05                  | 0.313                | 0.26  | 0.28 |
| Boulder       |               |                      |                      |                      |                      |                      |                        |                      |       |      |
| 50            | 17321 (98.86) | 0.994                | 0.041                | 0.986                | 0.036                | 0.007                | 0.01                   | 0.032                | 0.03  | 0.68 |
| 80            | 17321 (98.86) | 0.990                | 0.041                | 0.984                | 0.036                | 0.007                | 0.01                   | 0.032                | 0.03  | 0.68 |
| Ghoroghchi    |               |                      |                      |                      |                      |                      |                        |                      |       |      |
| 60            | 6267 (71.54)  | 0.935                | 0.037                | 0.952                | 0.038                | -0.017               | -0.02                  | 0.039                | 0.04  | 0.55 |
| 100           | 6267 (71.54)  | 0.932                | 0.037                | 0.949                | 0.038                | -0.017               | -0.02                  | 0.039                | 0.04  | 0.55 |
| Humansdorp    |               |                      |                      |                      |                      |                      |                        |                      |       |      |
| 60            | 8758 (99.70)  | 1.201                | 0.021                | 1.194                | 0.020                | 0.006                | 0.01                   | 0.011                | 0.01  | 0.90 |
| Wallaby Creek |               |                      |                      |                      |                      |                      |                        |                      |       |      |
| 95            | 4741 (54.12)  | 1.133                | 0.025                | 1.191                | 0.031                | -0.058               | -0.05                  | 0.060                | 0.05  | 0.91 |

N (%): number of observations/predictions (valid data percent);  $\mu_o$ : mean of observations;  $\sigma_o$ : standard deviation of observations;  $\mu_p$ : mean of predictions;  $\sigma_p$ : standard deviation of predictions; MB: mean bias; NB: normalised bias; RMSE: root mean square error; NRMSE: normalised root mean square error; r: correlation coefficient.

<sup>1</sup> For each site, time periods as in Table 2 have been considered.

**Table S3.** WT power losses (%) accounted for by WT system and cause/component<sup>1</sup> [20].

| WT system                                                 | Gearbox       | Generator       | Converter       | Unavailab. & repair  | Total    |
|-----------------------------------------------------------|---------------|-----------------|-----------------|----------------------|----------|
|                                                           | $f_{gearbox}$ | $f_{generator}$ | $f_{converter}$ | $f_{unavailability}$ | $F_{WT}$ |
| A: fixed-speed                                            | 4.0           | 2.5             | 0.0             | 0.2                  | 6.59     |
| B: variable-speed with induction generator                | 3.0           | 2.2             | 2.4             | 1.4                  | 8.71     |
| C: variable-speed with doubly fed induction generator     | 3.0           | 1.5             | 0.8             | 1.2                  | 6.36     |
| D: variable-speed with direct-drive synchronous generator | 0.0           | 3.5             | 4.7             | 0.1                  | 8.13     |

<sup>1</sup> WT-specific total losses ( $F_{WT}$ ) calculated based on Eq. (10).

**Table S4.** WT power losses (%) accounted for by site<sup>1</sup>.

| Site          | Electric grid connection | Ice       | Other       | Total by site |
|---------------|--------------------------|-----------|-------------|---------------|
|               | $f_{grid}$               | $f_{ice}$ | $f_{other}$ | $F_{site}$    |
| FINO3         | 2.0                      | 3.0       | 0.0         | 4.94          |
| Cabauw        | 1.0                      | 3.0       | 0.0         | 3.97          |
| Boulder       | 1.0                      | 4.0       | 0.0         | 4.96          |
| Ghoroghchi    | 4.0                      | 0.0       | 0.0         | 4.00          |
| Humansdorp    | 2.0                      | 0.0       | 0.0         | 2.00          |
| Wallaby Creek | 2.0                      | 4.0       | 0.0         | 5.92          |

<sup>1</sup> Site-specific total losses ( $F_{site}$ ) calculated based on Eq. (11).

**Table S5.** WT power losses (%) accounted for by site and height-related air density <sup>1,2</sup>.

| Site          | Total losses<br>by site | Height<br>(m) | Air density losses (or gains)<br>vs. air density standard value |           | Total losses by site<br>and air density |           |
|---------------|-------------------------|---------------|-----------------------------------------------------------------|-----------|-----------------------------------------|-----------|
|               |                         |               | Observed                                                        | Estimated | Observed                                | Estimated |
| FINO3         | 4.94                    | 60            | -0.82                                                           | -0.82     | 4.16                                    | 4.16      |
|               |                         | 100           | -0.49                                                           | -0.41     | 4.47                                    | 4.55      |
| Cabauw        | 3.97                    | 40            | -0.57                                                           | -1.14     | 3.42                                    | 2.87      |
|               |                         | 80            | 4.16                                                            | -0.73     | 7.97                                    | 3.26      |
| Boulder       | 4.96                    | 50            | 18.86                                                           | 19.51     | 22.88                                   | 23.50     |
|               |                         | 80            | 19.18                                                           | 19.67     | 23.19                                   | 23.66     |
| Ghoroghchi    | 4.00                    | 60            | 23.67                                                           | 22.45     | 26.73                                   | 25.55     |
|               |                         | 100           | 23.92                                                           | 22.45     | 26.96                                   | 25.55     |
| Humansdorp    | 2.00                    | 60            | 1.96                                                            | 2.86      | 3.92                                    | 4.80      |
| Wallaby Creek | 5.92                    | 95            | 7.51                                                            | 2.86      | 12.99                                   | 8.61      |

<sup>1</sup> For each site, height-related air density losses (or gains) ( $F_\rho$ ) have been calculated based on considering the difference of observed and estimated annual mean values reported in Table S2 with respect to air density standard value (1.225 kg/m<sup>3</sup>).

<sup>2</sup> Total losses by site and height-related air density have been calculated as:  $F_{\text{site} \& \rho} = 1 - [(1 - F_{\text{site}})(1 - F_\rho)]$ .

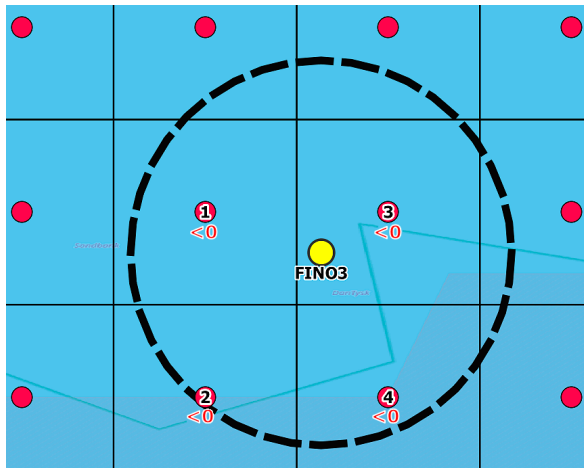

(a)

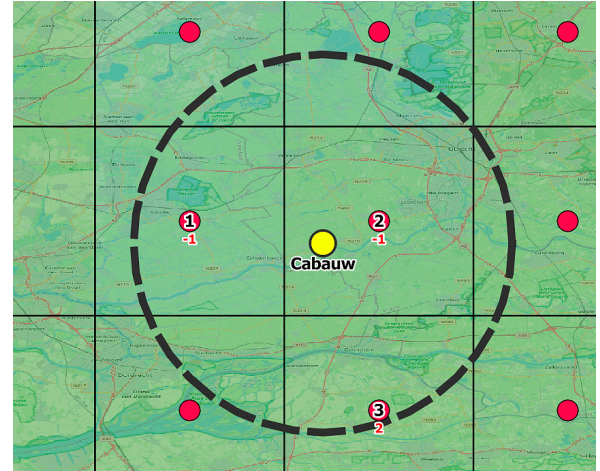

(b)

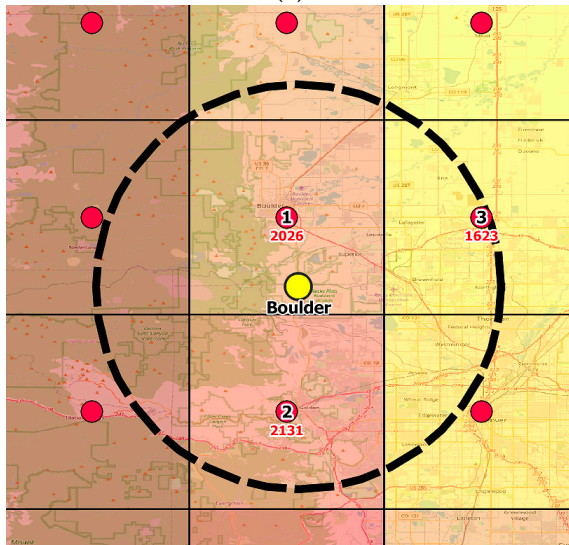

(c)

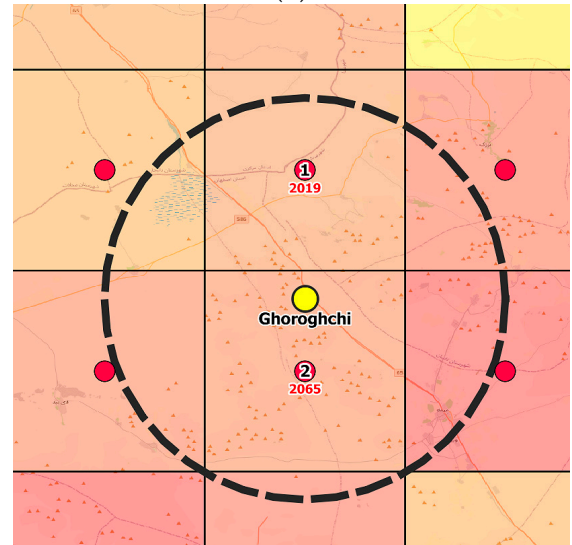

(d)

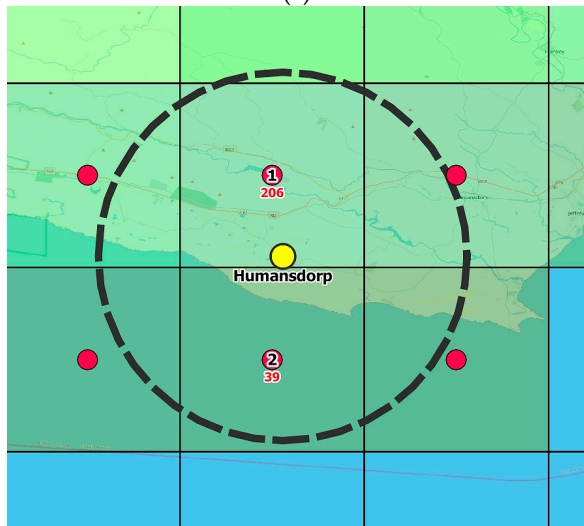

(e)

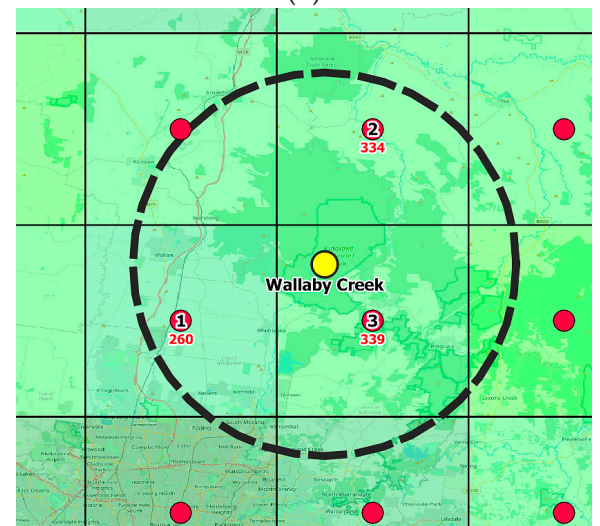

(f)

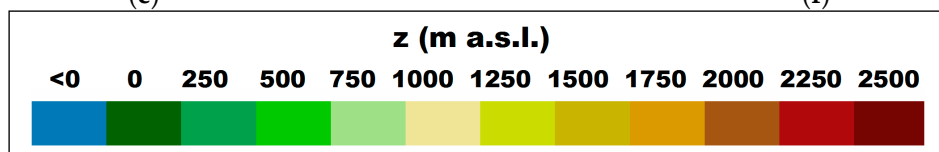

**Figure S1.** Mean altitude (m) of ERA5 grid points closest to each tower's location: (a) FINO3; (b) Cabauw; (c) Boulder; (d) Ghoroghchi; (e) Humansdorp; (f) Wallaby Creek. The values of grid points within a 0.25-deg buffer from towers (shown as black dashed circle) are also reported. Cartography basemap: OpenStreetMap.

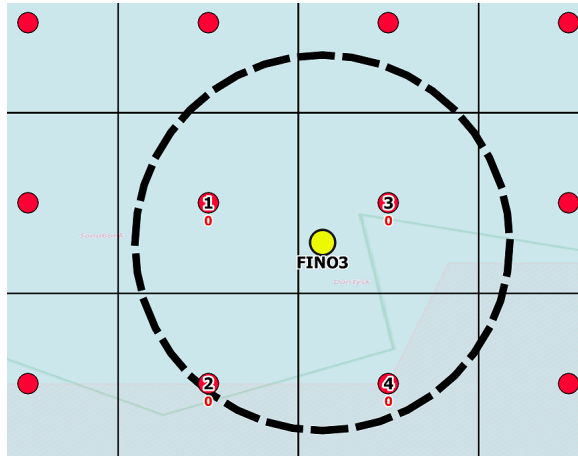

(a)

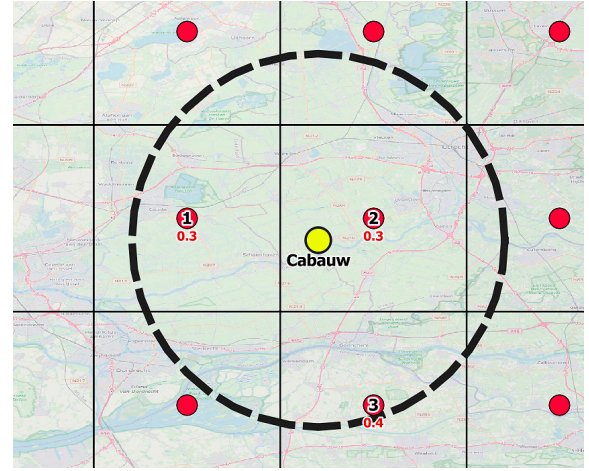

(b)

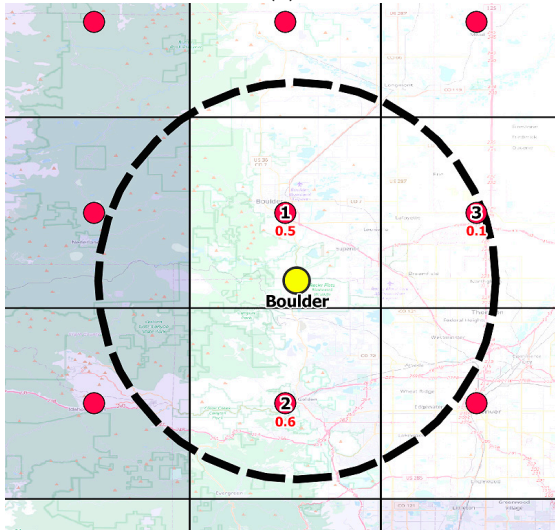

(c)

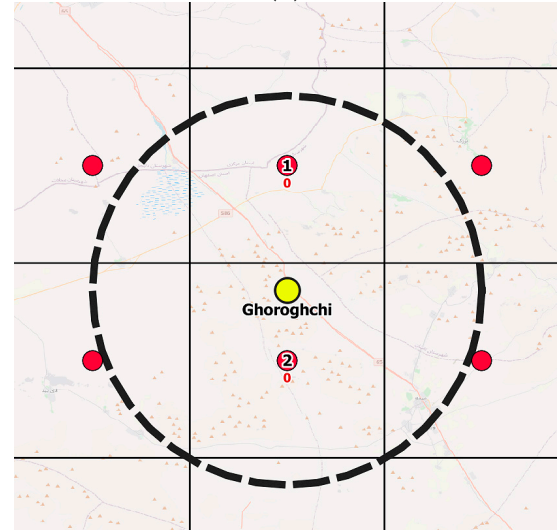

(d)

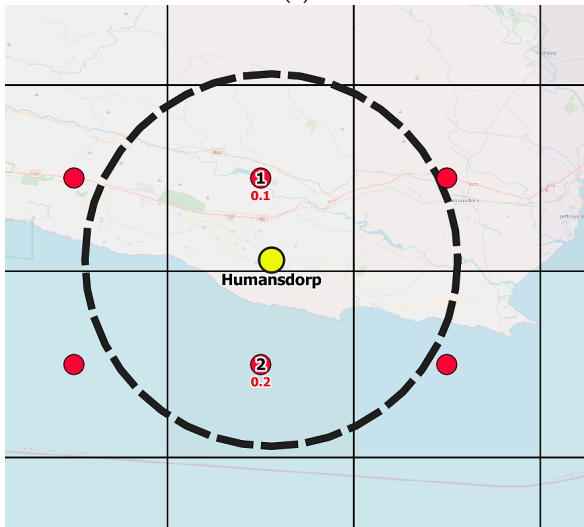

(e)

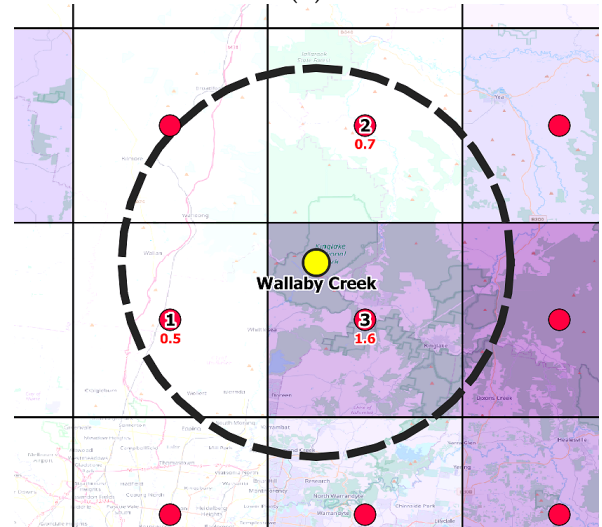

(f)

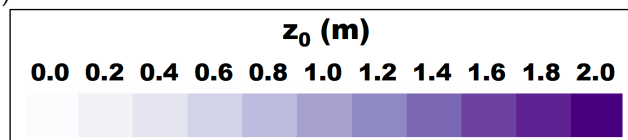

**Figure S2.** Mean roughness length (m) of ERA5 grid points closest to each tower's location: (a) FINO3; (b) Cabauw; (c) Boulder; (d) Ghoroghchi; (e) Humansdorp; (f) Wallaby Creek. The values of grid points within a 0.25-deg buffer from towers (shown as black dashed circle) are also reported. Cartography basemap: OpenStreetMap.



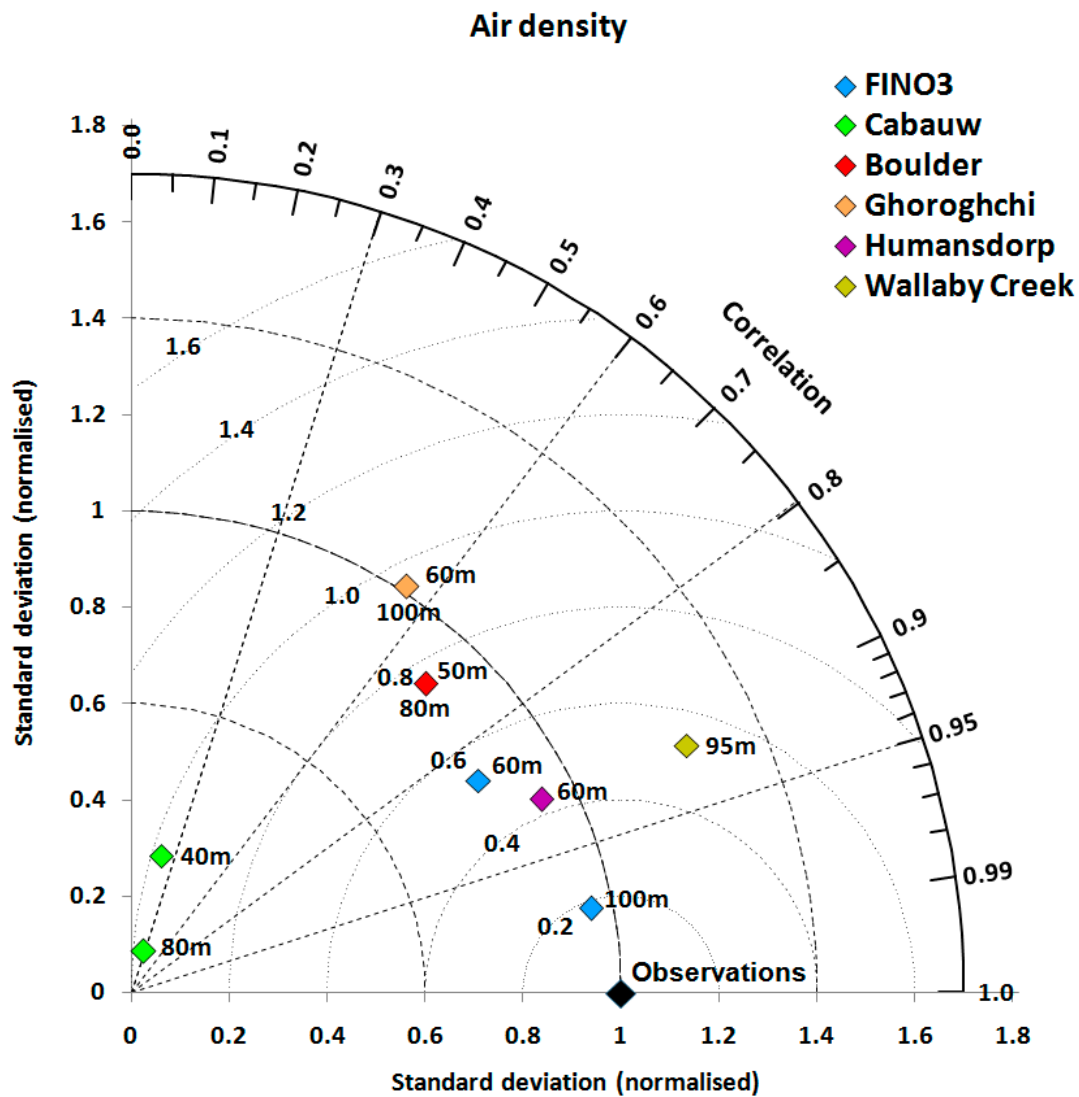

**Figure S3.** Taylor diagram of annual average air density predicted by height by ERA5 reanalysis data at the six study locations. Standard deviations of predictions ( $\sigma_p$ ) and RMSD (proportional to the radial distance from observations) are normalised by the standard deviation of observations ( $\sigma_o$ ).
